# Supplementary material for: Serologic Evidence of Ebolavirus Infection in a Population With No History of Outbreaks in the Democratic Republic of the Congo
Source: Oxford University Press journal article supplement (doi:10.1093/infdis/jix619), 2017-11-29
Supplement: jix619_suppl_suppfigure1.docx [file jix619_suppl_suppfigure1.docx]

**Supplemental Figure 1**. Subject inclusion for the serosurvey participants from the Sankuru District, Democratic Republic of Congo.

No output
(n=193)

Serology available (n=3,440)

Duplicate IDs
(n=50a)

Unique IDs
(n=3,390)

Basic demographics only
(n=835)

Serological samples (n=3,633)

Participation in questionnaire
(n=2,580)

“Empty” sample
(n=96)

Sample “not found”
(n=97)

Discordantb serology
(n=2)

Concordantb serology
(n=23)

Study sample (n=3,415)

a 50 samples with duplicate IDs resulted in 25 pairs; for these subjects, optical densities were averaged.

b Concordance/discordance of serologic results was based upon the cut-off, defined as ≥ 5 standard deviations away from the control group average optical density (μ=0.09; σ2=0.071). Positive serologic results are those with optical density readings >0.445.
